# Supplementary material for: Progressive Resistance Training for Concomitant Increases in Muscle Strength and Bone Mineral Density in Older Adults: A Systematic Review and Meta-Analysis
Source: PubMed Central journal article supplement — Sports Med. 2022 May 24;52(8):1939–60. doi: 10.1007/s40279-022-01675-2 (PMC9325860; doi:10.1007/s40279-022-01675-2), 2022-05-24
Supplement: 40279_2022_1675_MOESM2_ESM.pdf [file 40279_2022_1675_MOESM2_ESM.pdf]

## **Progressive resistance training for concomitant increases in muscle strength and bone mineral density in older adults: A systematic review and meta-analysis**

Steven J. O'Bryan<sup>1</sup>, Catherine Guiliano<sup>1</sup>, Mary N. Woessner<sup>1</sup>, Sara Vogrin<sup>2</sup>, Cassandra Smith<sup>1,2</sup>, Gustavo Duque<sup>2,3</sup>, Itamar Levinger<sup>1,2,3</sup>

<sup>1</sup>Institute for Health and Sport (IHeS), Victoria University, Melbourne, Victoria, Australia

<sup>2</sup>Australian Institute for Musculoskeletal Science (AIMSS), The University of Melbourne and Western Health, Melbourne, VIC, Australia

<sup>3</sup>Department of Medicine-Western Health, Melbourne Medical School, The University of Melbourne, Melbourne, VIC, Australia

Journal: Sports Medicine

### **Corresponding author:**

Steven Jeffery O'Bryan

Institute for Health and Sport

Victoria University – Footscray Park Campus

Melbourne, Victoria 3134

Australia

Email: [steven.obryan@vu.edu.au](mailto:steven.obryan@vu.edu.au)

**Supplement 2.** Secondary outcome measures reported from studies included in the meta-analysis.

| <b>Reference</b>       | <b>Body mass and composition</b>                                                                                 | <b>Functional/performance outcomes</b>                                                                                              | <b>Falls</b> | <b>Self-efficacy</b>                   |
|------------------------|------------------------------------------------------------------------------------------------------------------|-------------------------------------------------------------------------------------------------------------------------------------|--------------|----------------------------------------|
| Pruitt et al. [1]      | –                                                                                                                | –                                                                                                                                   | –            | –                                      |
| Taaffe et al. [2]      | G1: ↑ thigh type I and II muscle fibre CSA; ↔ thigh LM<br>G2: ↑ thigh type I and II muscle fibre CSA; ↔ thigh LM | –                                                                                                                                   | –            | –                                      |
| McCartney et al. [3]   | G1: ↑ thigh CSA                                                                                                  | G1: ↑ endurance in cycling, treadmill walking and stair climbing                                                                    | –            | –                                      |
| Taaffe et al. [4]      | G1: ↑ LM; ↔ FM<br>G2: ↑ LM; ↔ FM<br>G3: ↑ LM; ↔ FM                                                               | G1: ↑ chair stand x5; ↔ 6 m backward walk<br>G2: ↑ chair stand x5; ↔ 6 m backward walk<br>G3: ↑ chair stand x5; ↔ 6 m backward walk | –            | –                                      |
| Rhodes et al. [5]      | G1: ↔ BM, BF                                                                                                     | G1: ↔ trunk flexion flexibility, grip strength                                                                                      | –            | –                                      |
| Vincent and Braith [6] | –                                                                                                                | –                                                                                                                                   | –            | –                                      |
| Jessup et al. [7]      | G1: ↓ BM                                                                                                         | G1: ↓ postural sway                                                                                                                 | –            | G1: ↔ osteoporosis self-efficacy scale |

| Reference             | Body mass and composition | Functional/performance outcomes                                                                                                                                    | Falls                                                    | Self-efficacy                                                                              |
|-----------------------|---------------------------|--------------------------------------------------------------------------------------------------------------------------------------------------------------------|----------------------------------------------------------|--------------------------------------------------------------------------------------------|
| Bunout et al. [8]     | G1: ↔ BM                  | G1: ↑ short physical performance test battery (3 tasks), timed up and go; ↔ postural sway, 12 min walk speed                                                       | –                                                        | –                                                                                          |
| Karinkanta et al. [9] | G1: ↔ BM<br>G2: ↔ BM      | G1: ↔ figure of 8 running<br>G2: ↑ figure of 8 running                                                                                                             | –                                                        | G1: ↔ self-rated physical functioning scale<br>G2: ↑ self-rated physical functioning scale |
| Bocalini et al. [10]  | G1: ↓ BM; ↔ BF, LM        | G1: ↑ 30-s Chair stand, sit and reach flexibility, one-leg stance (static balance); ↔ timed up and go, VO <sup>2</sup> Max                                         | –                                                        | –                                                                                          |
| Marques et al. [11]   | G1: ↑ LM; ↓ FM            | G1: ↑ one-leg stance (static balance), timed up and go; ↓ postural sway                                                                                            | –                                                        | –                                                                                          |
| Marques et al. [12]   | G1: ↓ FM; ↔ LM            | G1: ↑ one-leg stance (static balance), handgrip strength; ↓ postural sway; ↔ timed up and go, 6 min walk speed                                                     | –                                                        | –                                                                                          |
| Villareal et al. [13] | G1: ↔ BM; ↑ LM; ↓ FM      | G1: ↑ Physical performance test battery (7 tasks), VO <sup>2</sup> Peak, one-leg stance (static balance), obstacle course speed (dynamic balance), 25 m gait speed | –                                                        | G1: ↑ health-related quality of life survey                                                |
| Uusi-Rasi et al. [14] | G1: ↔ BM, BF              | G1: ↑ 4 m gait speed, backward walking (dynamic balance), chair stand x5; ↔ timed up and go                                                                        | G1: ↔ total number of falls; ↓ number of injurious falls | –                                                                                          |

G1 = intervention group 1; G2 = intervention group 2; ↑ = statistical increase post-training compared to control group ( $p \leq 0.05$ ); ↓ statistical decrease post-training compared to control group ( $p \leq 0.05$ ); ↔ = no statistical difference post-training compared to the control group ( $p > 0.05$ ); CSA = cross sectional area; BM = body mass; LM = lean mass; FM = fat mass; BF = body fat %;

1. Pruitt, L.A., D.R. Taaffe, and R. Marcus, Effects of a one-year high-intensity versus low-intensity resistance training program on bone mineral density in older women. *J Bone Miner Res*, 1995. **10**(11): p. 1788-1795.
2. Taaffe, D.R., L. Pruitt, G. Pyka, et al., Comparative effects of high- and low-intensity resistance training on thigh muscle strength, fiber area, and tissue composition in elderly women. *C Physiol*, 1996. **16**(4): p. 381-392.
3. McCartney, N., A.L. Hicks, J. Martin, et al., A longitudinal trial of weight training in the elderly: continued improvements in year 2. *J Gerontol A Biol Sci Med Sci*, 1996. **51**(6): p. B425-B433.
4. Taaffe, D.R., C. Duret, S. Wheeler, et al., Once-weekly resistance exercise improves muscle strength and neuromuscular performance in older adults. *J Am Geriatr Soc*, 1999. **47**(10): p. 1208-1214.
5. Rhodes, E.C., A.D. Martin, J.E. Taunton, et al., Effects of one year of resistance training on the relation between muscular strength and bone density in elderly women. *Br J Sports Med*, 2000. **34**(1): p. 18-22.
6. Vincent, K.R. and R.W. Braith, Resistance exercise and bone turnover in elderly men and women. *Med Sci Sports Exerc*, 2002. **34**(1): p. 17-23.
7. Jessup, J.V., C. Horne, R. Vishen, et al., Effects of exercise on bone density, balance, and self-efficacy in older women. *Biol Res Nurs*, 2003. **4**(3): p. 171-180.
8. Bunout, D., G. Barrera, L. Leiva, et al., Effects of vitamin D supplementation and exercise training on physical performance in Chilean vitamin D deficient elderly subjects. *Exp Gerontol*, 2006. **41**(8): p. 746-752.
9. Karinkanta, S., A. Heinonen, H. Sievänen, et al., A multi-component exercise regimen to prevent functional decline and bone fragility in home-dwelling elderly women: randomized, controlled trial. *Osteoporos Int*, 2007. **18**(4): p. 453-462.
10. Bocalini, D.S., A.J. Serra, and L. Dos Santos, Moderate resistive training maintains bone mineral density and improves functional fitness in postmenopausal women. *J Aging Res*, 2010. **2010**.
11. Marques, E.A., F. Wanderley, L. Machado, et al., Effects of resistance and aerobic exercise on physical function, bone mineral density, OPG and RANKL in older women. *Exp Gerontol*, 2011a. **46**(7): p. 524-532.
12. Marques, E.A., J. Mota, L. Machado, et al., Multicomponent training program with weight-bearing exercises elicits favorable bone density, muscle strength, and balance adaptations in older women. *Calcif Tissue Int*, 2011b. **88**(2): p. 117-129.
13. Villareal, D.T., S. Chode, N. Parimi, et al., Weight loss, exercise, or both and physical function in obese older adults. *N Engl J Med*, 2011. **364**(13): p. 1218-1229.
14. Uusi-Rasi, K., R. Patil, S. Karinkanta, et al., Exercise and vitamin D in fall prevention among older women: a randomized clinical trial. *JAMA Intern Med*, 2015. **175**(5): p. 703-711.
