# Supplementary material for: Progressive Resistance Training for Concomitant Increases in Muscle Strength and Bone Mineral Density in Older Adults: A Systematic Review and Meta-Analysis
Source: PubMed Central journal article supplement — Sports Med. 2022 May 24;52(8):1939–60. doi: 10.1007/s40279-022-01675-2 (PMC9325860; doi:10.1007/s40279-022-01675-2), 2022-05-24
Supplement: 40279_2022_1675_MOESM3_ESM.pdf [file 40279_2022_1675_MOESM3_ESM.pdf]

## **Progressive resistance training for concomitant increases in muscle strength and bone mineral density in older adults: A systematic review and meta-analysis**

Steven J. O'Bryan<sup>1</sup>, Catherine Guiliano<sup>1</sup>, Mary N. Woessner<sup>1</sup>, Sara Vogrin<sup>2</sup>, Cassandra Smith<sup>1,2</sup>, Gustavo Duque<sup>2,3</sup>, Itamar Levinger<sup>1,2,3</sup>

<sup>1</sup>Institute for Health and Sport (IHeS), Victoria University, Melbourne, Victoria, Australia

<sup>2</sup>Australian Institute for Musculoskeletal Science (AIMSS), The University of Melbourne and Western Health, Melbourne, VIC, Australia

<sup>3</sup>Department of Medicine-Western Health, Melbourne Medical School, The University of Melbourne, Melbourne, VIC, Australia

Journal: Sports Medicine

### **Corresponding author:**

Steven Jeffery O'Bryan

Institute for Health and Sport

Victoria University – Footscray Park Campus

Melbourne, Victoria 3134

Australia

Email: [steven.obryan@vu.edu.au](mailto:steven.obryan@vu.edu.au)

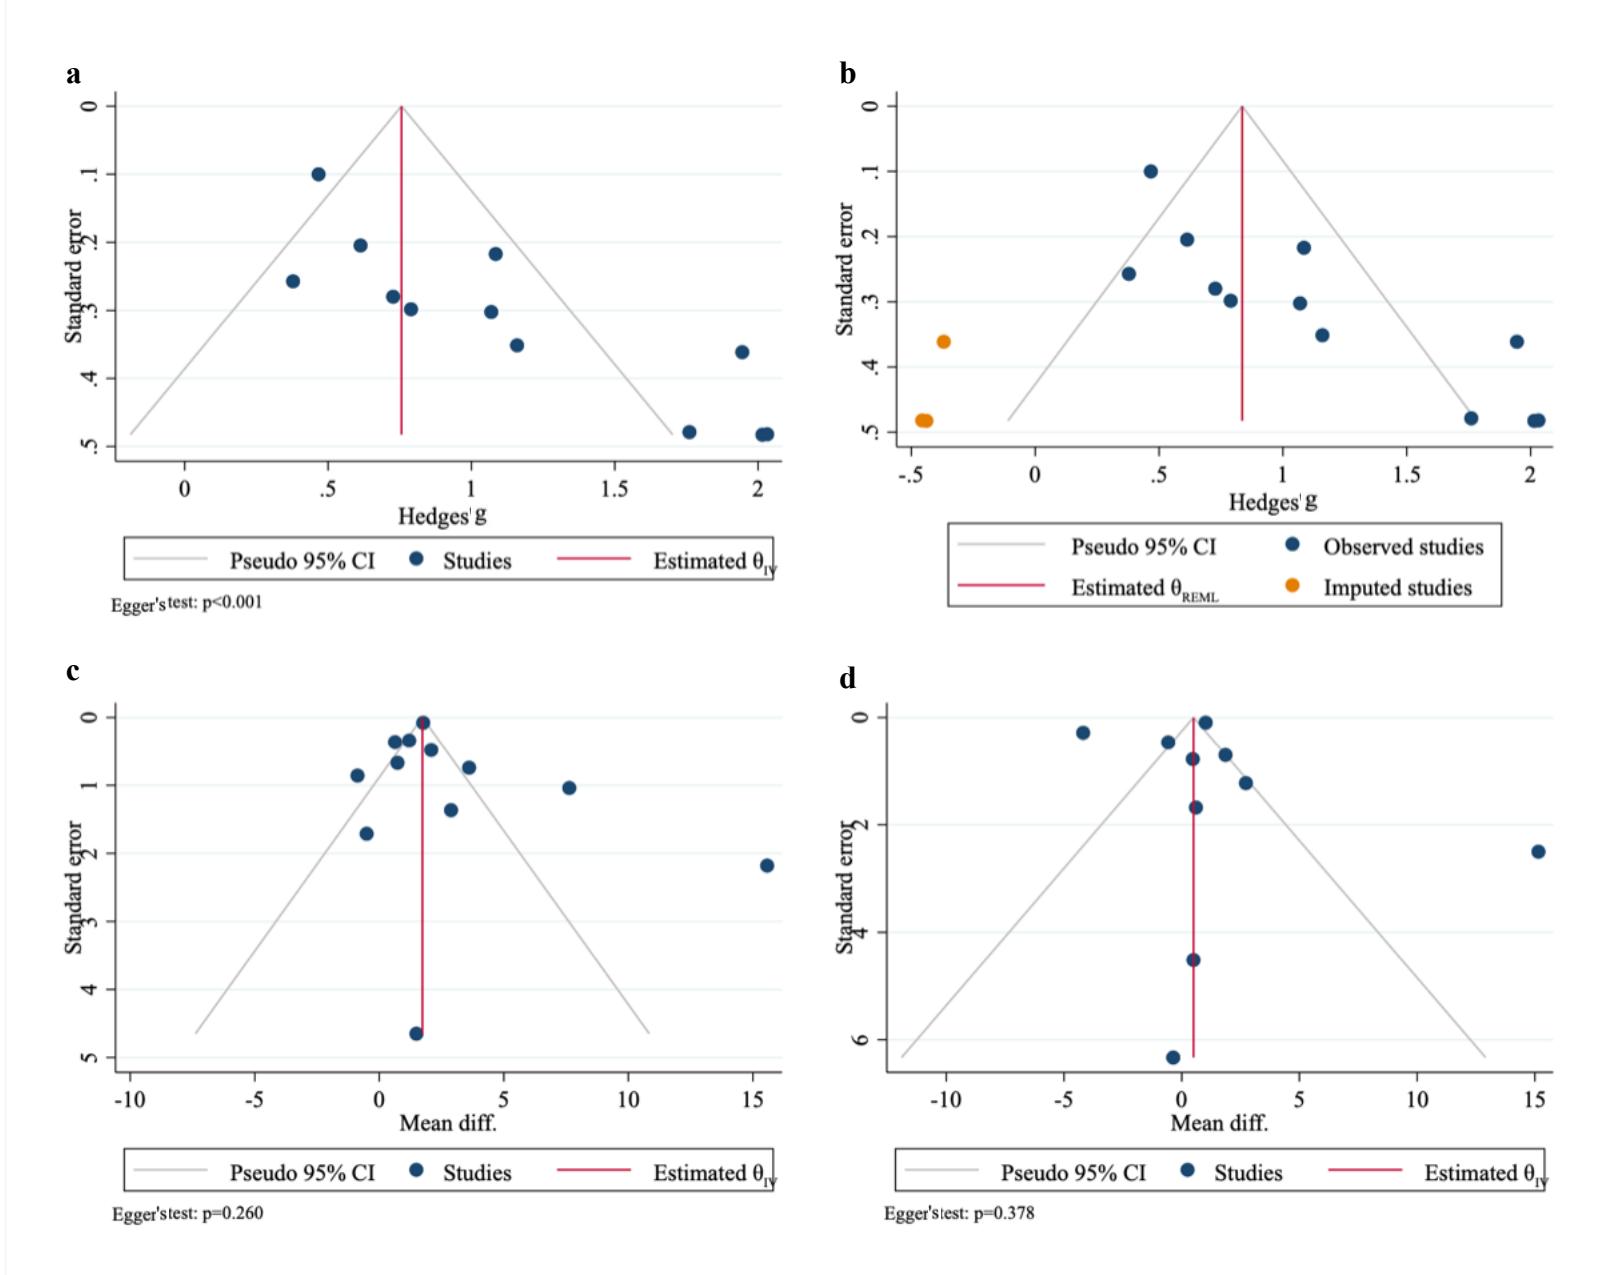

**Supplement 3.** Small study effect was observed for strength outcome (Egger's test  $p < 0.001$ ) (A). Trim and fill method imputed 3 additional studies and pooled Hedges' g was only slightly smaller than initial results (B). While there was some asymmetry in funnel plots for both femur/hip (C) and lumbar spine (D) BMD outcomes, Egger's test was not significant ( $p > 0.05$ )
